# Supplementary material
Source: publisher figshare collection journal article supplement (https://tandf.figshare.com/ndownloader/files/14135132)
Supplement: Supplementary file 1 [file 14135132]

Supplemental table 1: ICD-9 for ESRD

| ICD-9 | Condition |
| --- | --- |
| 585.5 | Chronic Kidney Disease, stage V |
| 585.6 | End Stage Renal Disease |
| 996.73 | Other complications due to renal dialysis device implant and graft |
| 996.68 | Infection and inflammatory reaction due to peritoneal dialysis catheter |
| 996.56 | Mechanical complication due to peritoneal dialysis catheter |
| 792.5 | Cloudy (hemodialysis or peritoneal dialysis) effluent |
| 458.21 | Hypotension of dialysis |

Supplemental table 2: ICD-9 for principal diagnosis

| Principal diagnosis group | ICD – 9 code |
| --- | --- |
| Cardiovascular disease | 390-459 |
| Hematology/oncology | 280-289, 140-239 |
| Infectious disease | 001-139 |
| Endocrine and metabolic disease | 240-279 |
| Respiratory disease | 460-519 |
| Gastrointestinal disease | 520-579 |
| Injury and poisoning | 800-999 |
| Other | 290-319,320-359,360-389,580-629,630-679,680-709,710-739,740-759,760-779,780-799 |

Supplemental table 3:Odds ratios for the association between admission albumin-corrected calcium phosphate product and in-hospital acute kidney injury occurrence within 7 days (n=4830)

| Calcium phosphate product at hospital admission (mg2/dL2) | Univariate analysis | | Multivariate analysis | |
| --- | --- | --- | --- | --- |
| OR (95% CI) | p | Adjusted OR (95 % CI) | p |
| <22 | 1 (ref) |  | 1 (ref) |  |
| 22-<27 | 1.27 (0.88-1.84) | 0.20 | 1.11 (0.75-1.65) | 0.59 |
| 27-<32 | 1.76 (1.28-2.47) | 0.001 | 1.50 (1.06-2.15) | 0.02 |
| 32-<37 | 1.91 (1.40-2.66) | <0.001 | 1.49 (1.06-2.13) | 0.02 |
| 37-<42 | 2.20 (1.59-3.11) | <0.001 | 1.85 (1.30-2.67) | <0.001 |
| ≥42 | 2.20 (1.56-3.15) | <0.001 | 1.69 (1.16-2.49) | 0.006 |

Adjusted for age, sex, race, Charlson score, baseline GFR, history of coronary artery disease, hypertension, diabetes mellitus, congestive heart failure, peripheral vascular disease, stroke, principal diagnosis, use of ACEI/ARB, NSAID, diuretics, calcium supplements, the need for vasopressor and mechanical ventilator at hospital admission

Supplemental Figure 1: Study workflow design
